# Supplementary material for: Application of Green Tea Catechin for Inducing the Osteogenic Differentiation of Human Dedifferentiated Fat Cells in Vitro
Source: MDPI journal article supplement (doi:10.3390/ijms161226081), 2015-11-25
Supplement: s1 [file s1]

# Supplementary Materials: Application of Green Tea Catechin for Inducing the Osteogenic Differentiation of Human Dedifferentiated Fat Cells *in Vitro*

Koji Kaida, Yoshitomo Honda, Yoshiya Hashimoto, Masahiro Tanaka and Shunsuke Baba

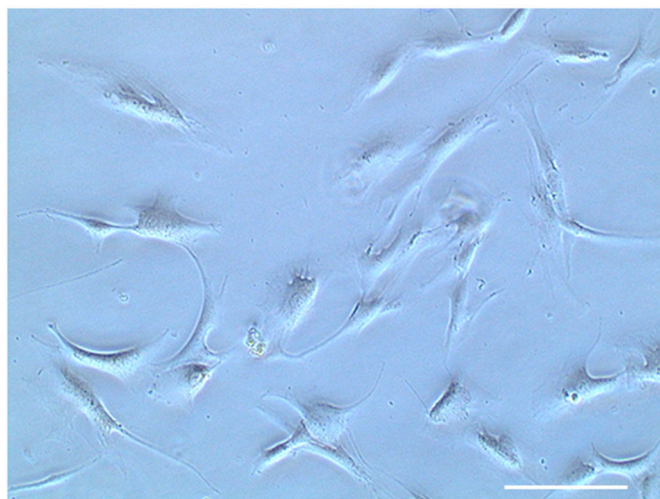

**Figure S1.** Representative phase contrast image of human dedifferentiated fat (DEAT) cells. Bar = 50  $\mu$ m.
